# Supplementary material for: Comparative Metabolomics of Early Development of the Parasitic Plants Phelipanche aegyptiaca and Triphysaria versicolor
Source: MDPI journal article supplement (doi:10.3390/metabo9060114), 2019-06-13
Supplement: s1 [file s1]

### *P. aegyptiaca* Experiment 1

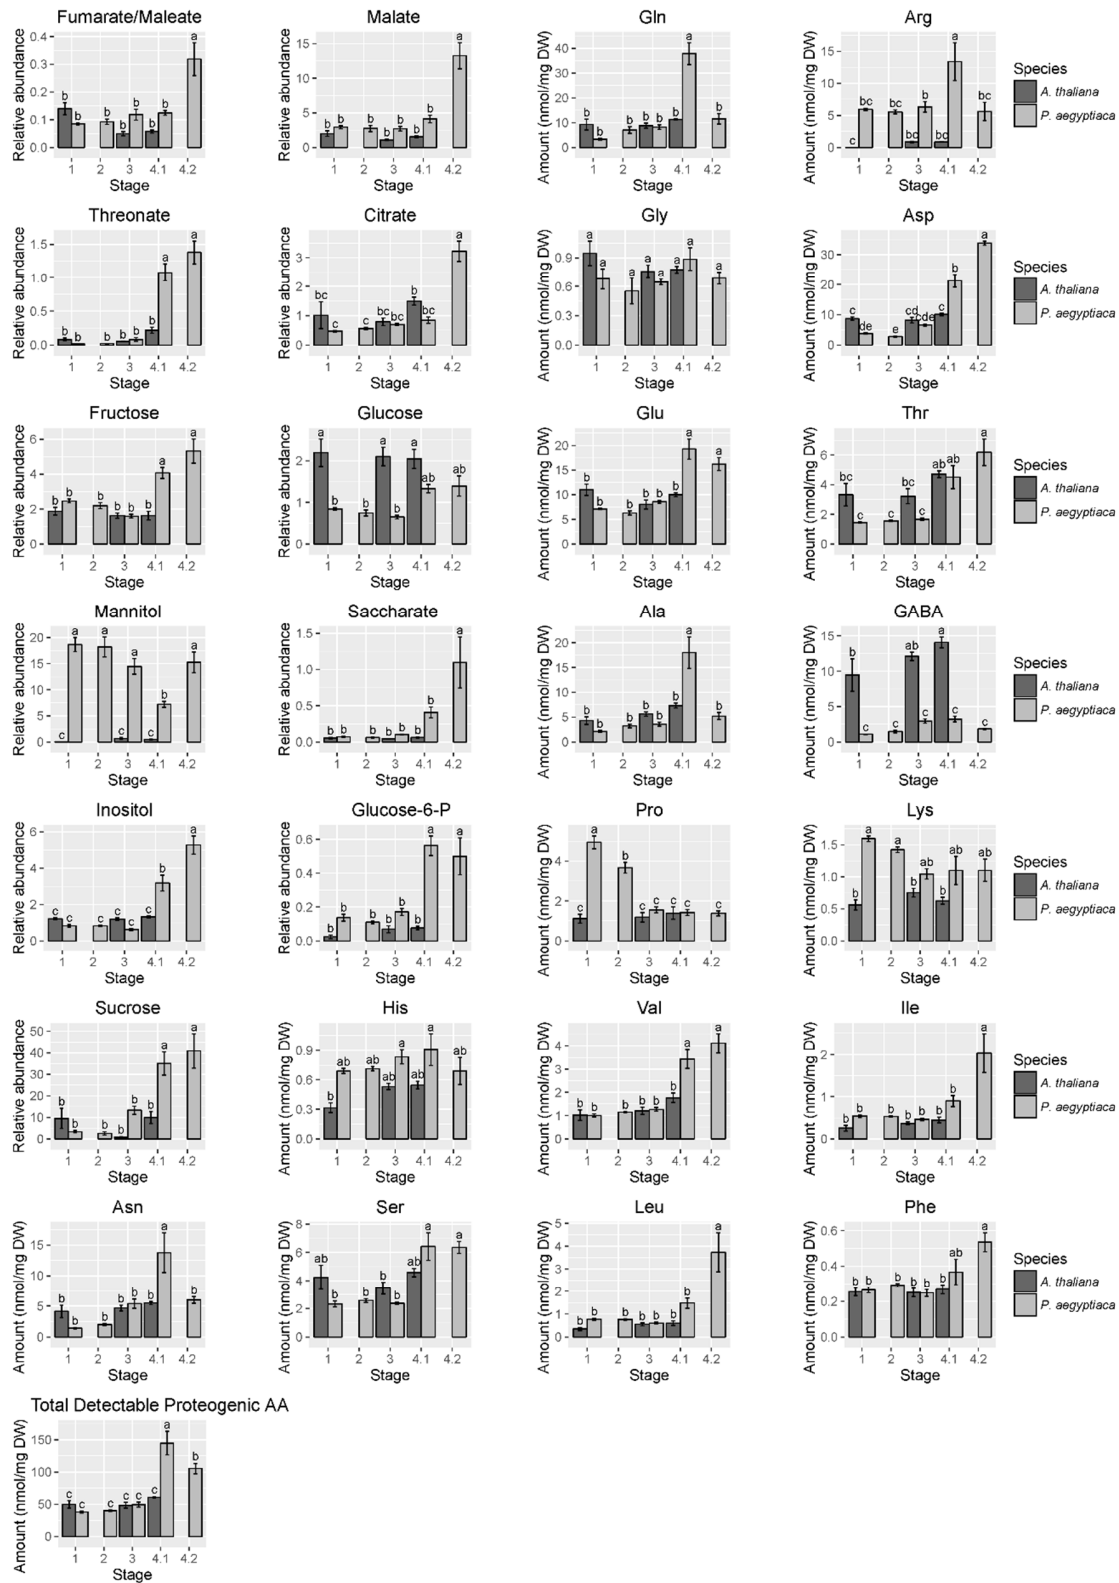

## *P. aegyptiaca* Experiment 2

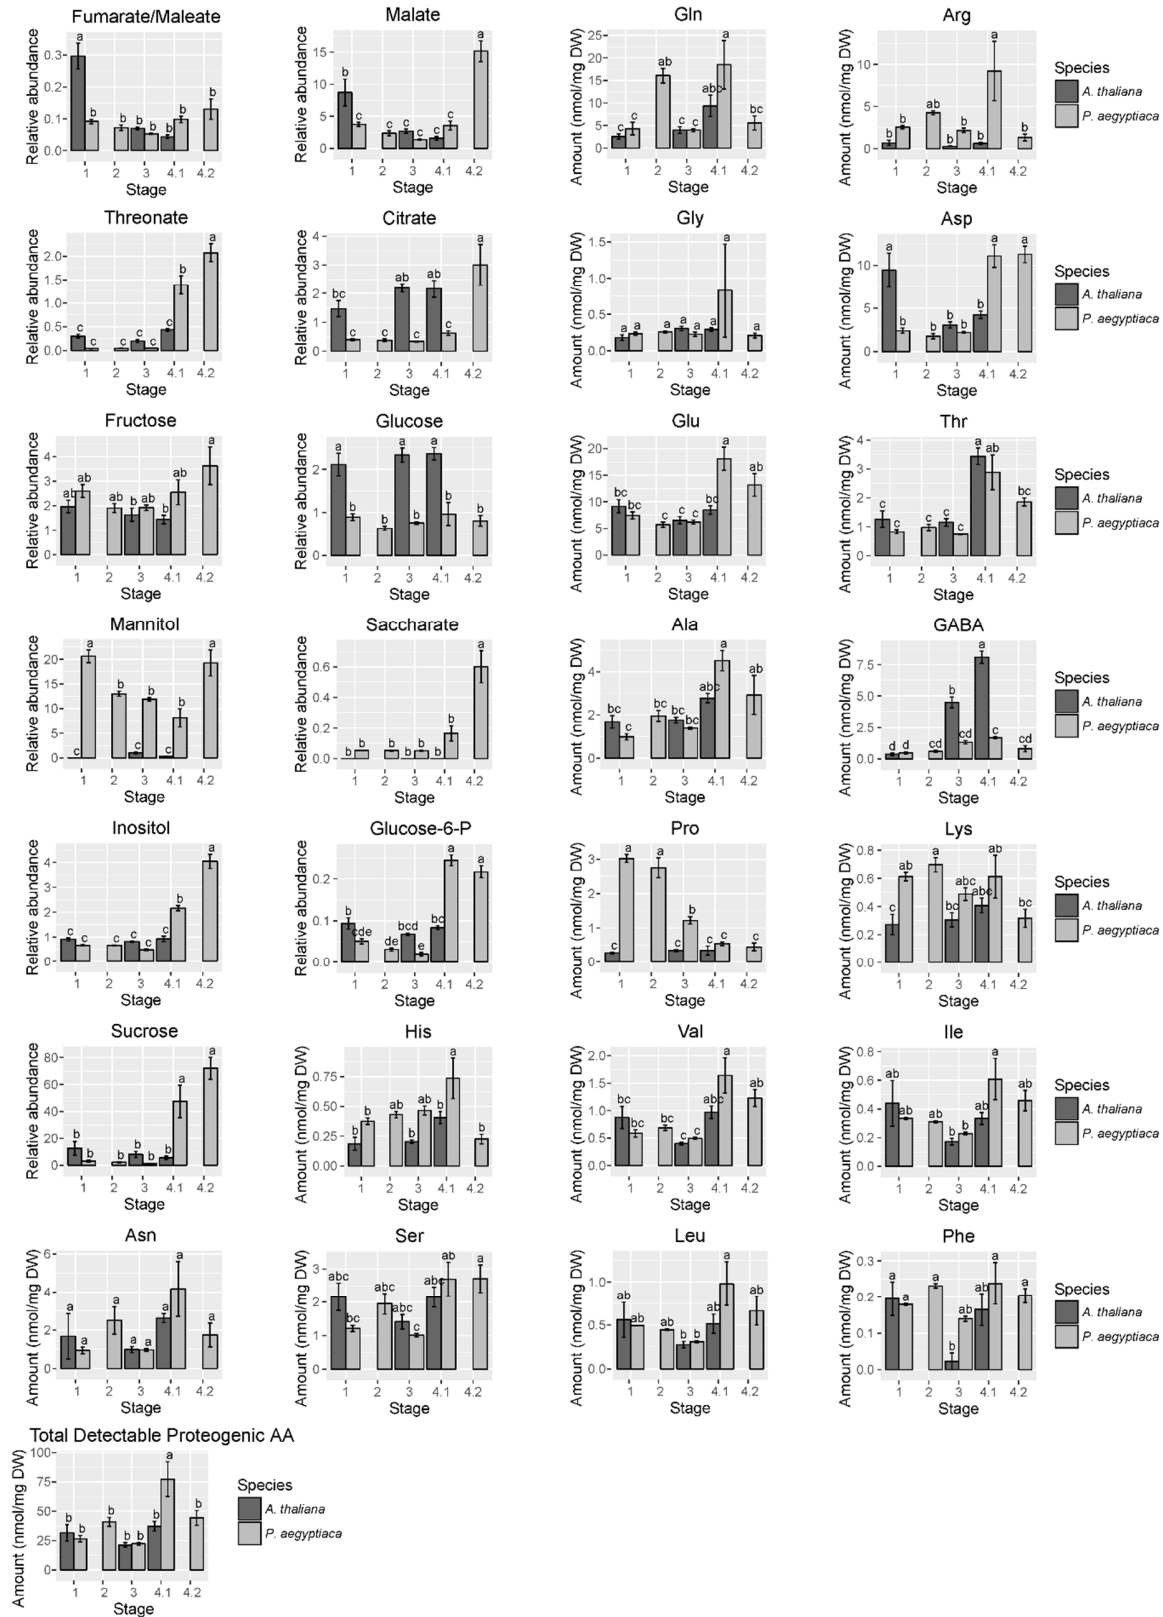

*T. versicolor*

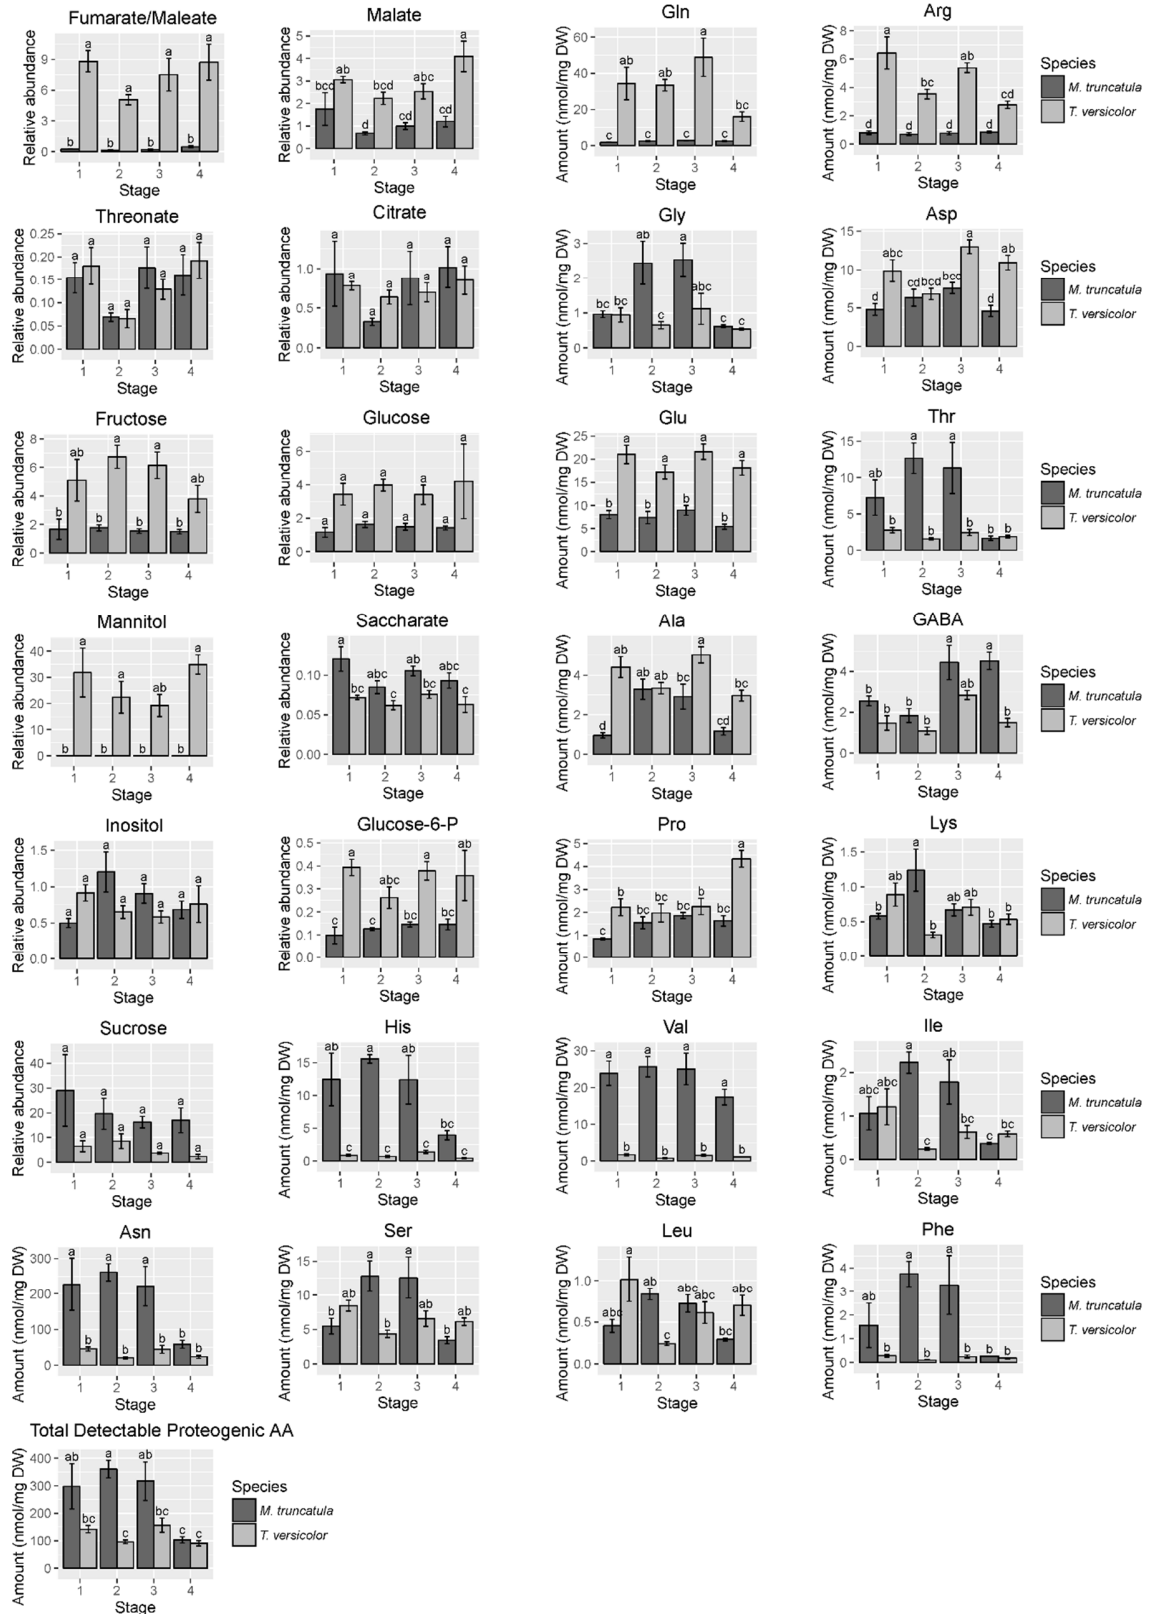

**Figure S2.** Abundance of quantified metabolites and total detectable protein coding amino acids. Data on *P. aegyptiaca* from the first and second experiment were graphed separately. Four to five biological replicates are used for each sample type. Amino acid abundance is expressed in nmol/mg DW. Sugar, carboxylic acid, and sugar alcohol abundance is expressed in relative abundance. In cases where *A. thaliana* host root was not collected for corresponding *P. aegyptiaca* stages, "NA" is shown. Tukey HSD connecting letters are given, run on host and parasite sample values concurrently. Standard error bars shown.
