# Supplementary material for: Comparative Metabolomics of Early Development of the Parasitic Plants Phelipanche aegyptiaca and Triphysaria versicolor
Source: MDPI journal article supplement (doi:10.3390/metabo9060114), 2019-06-13
Supplement: s1 [file s1]

A.

## Asparagine synthase Orthogroup 721

### Class II

- AT5G65010.2
- AT5G10240.1
- PhAeBC5\_6915.1
- TrVeBC3\_4470.1

### Class I

- AT3G47340.1
- PhAeBC5\_258.1
- TrVeBC3\_621.3

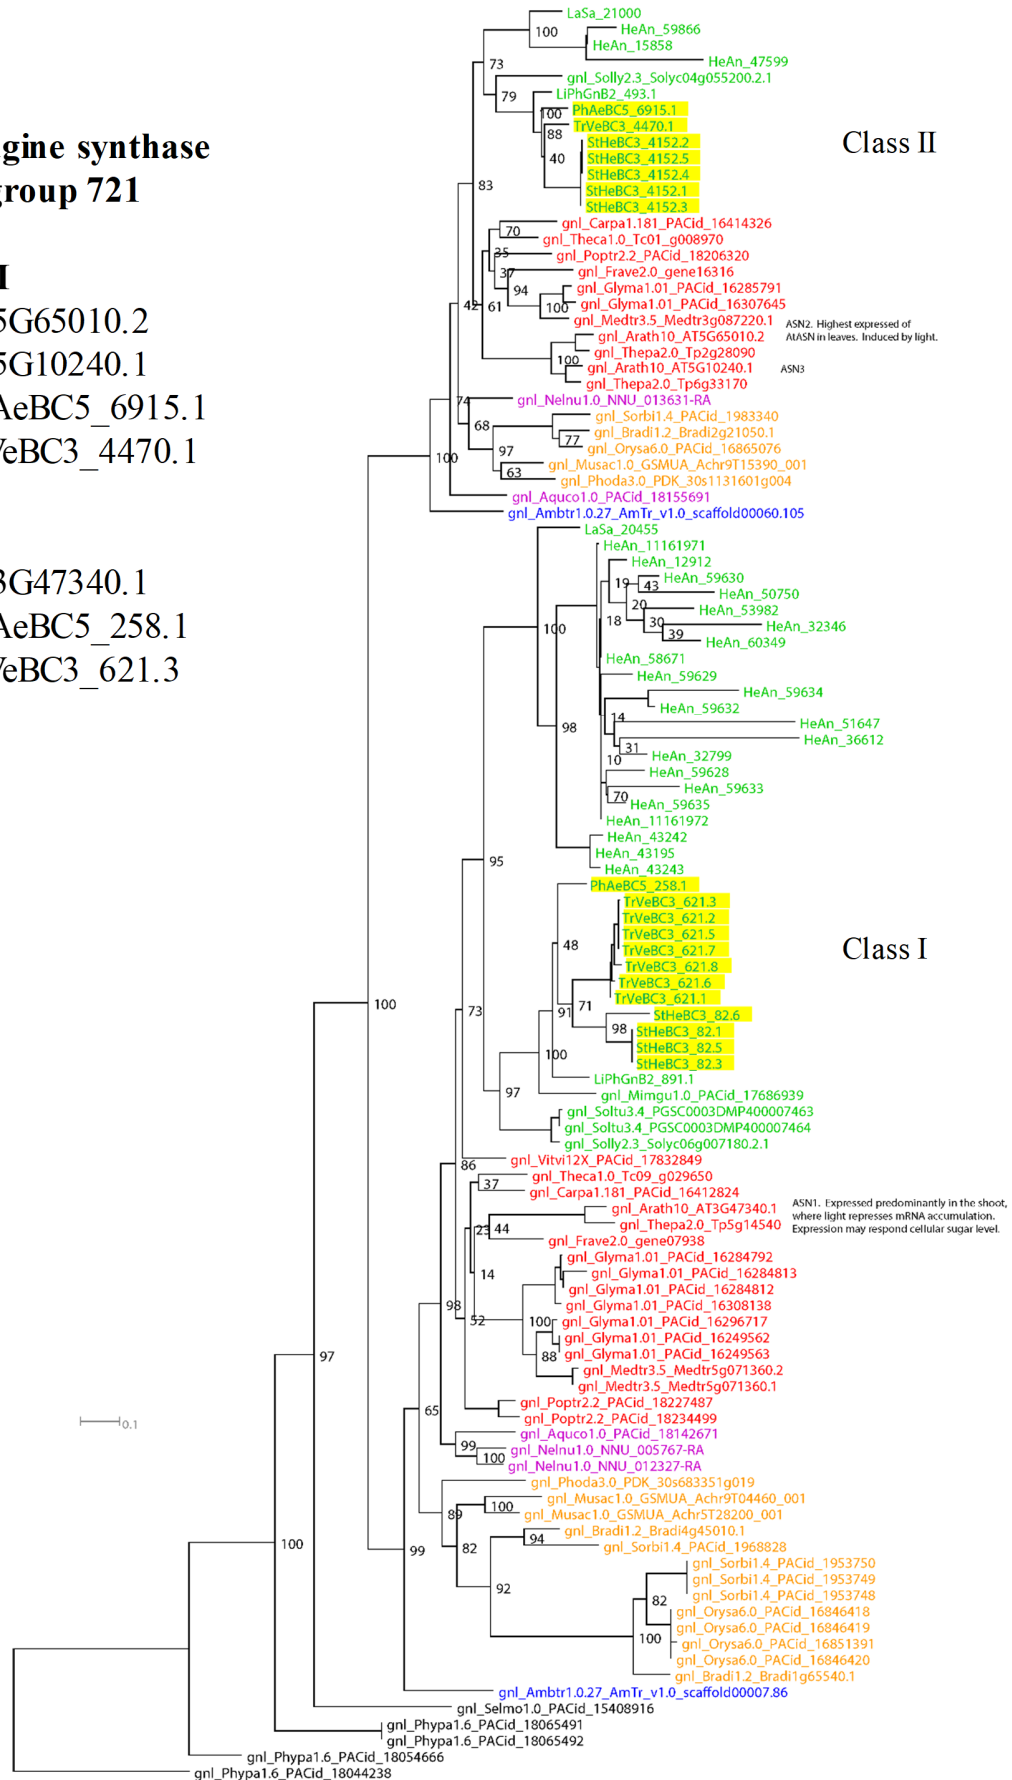

B.

## Aspartate aminotransferase Orthogroup 2682

- AT2G22250.2
- OrAeBC5\_520.1
- TrVeBC3\_2708.1

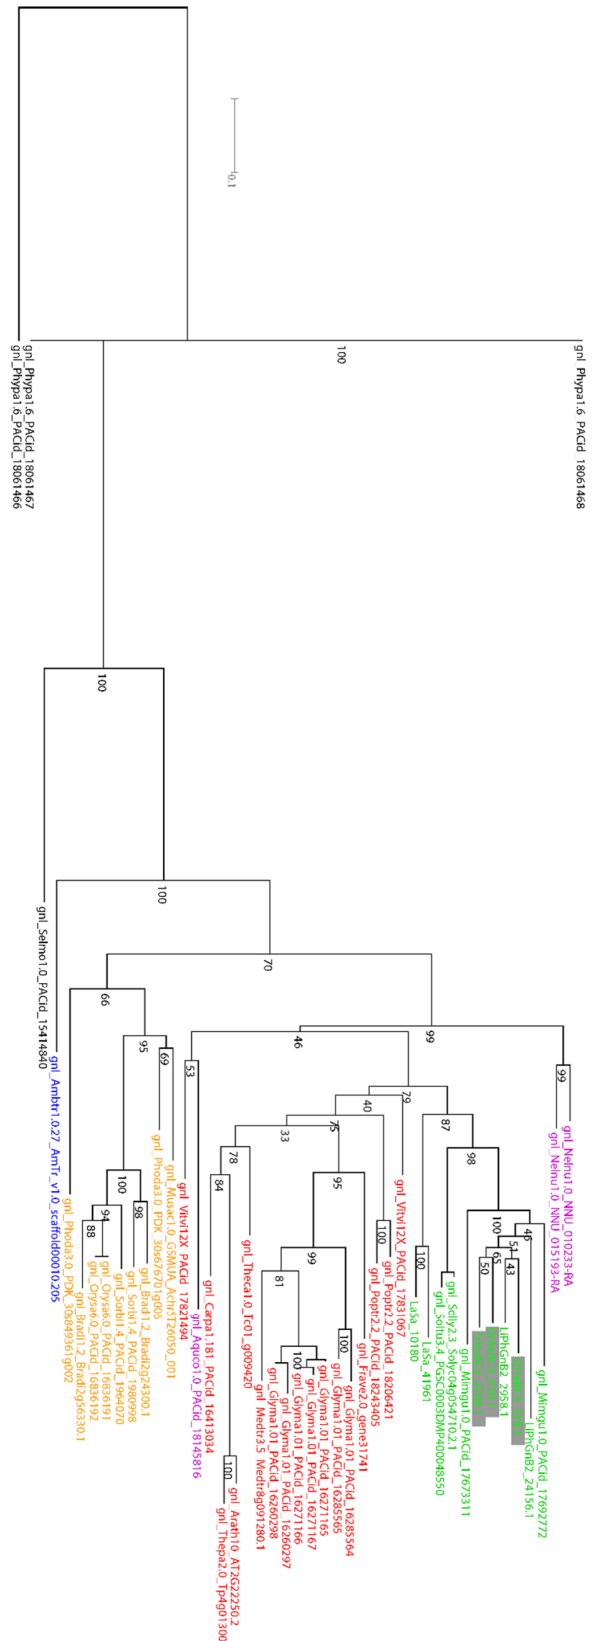



## Aspartate aminotransferase 2-4 Orthogroup 2325

- AT5G19550.1 (AAT2)
- AT1G62800.2 (AAT4)
- AT5G11520.1 (AAT3)
- OrAeBC5\_403.1
- TrVeBC3\_1788.2

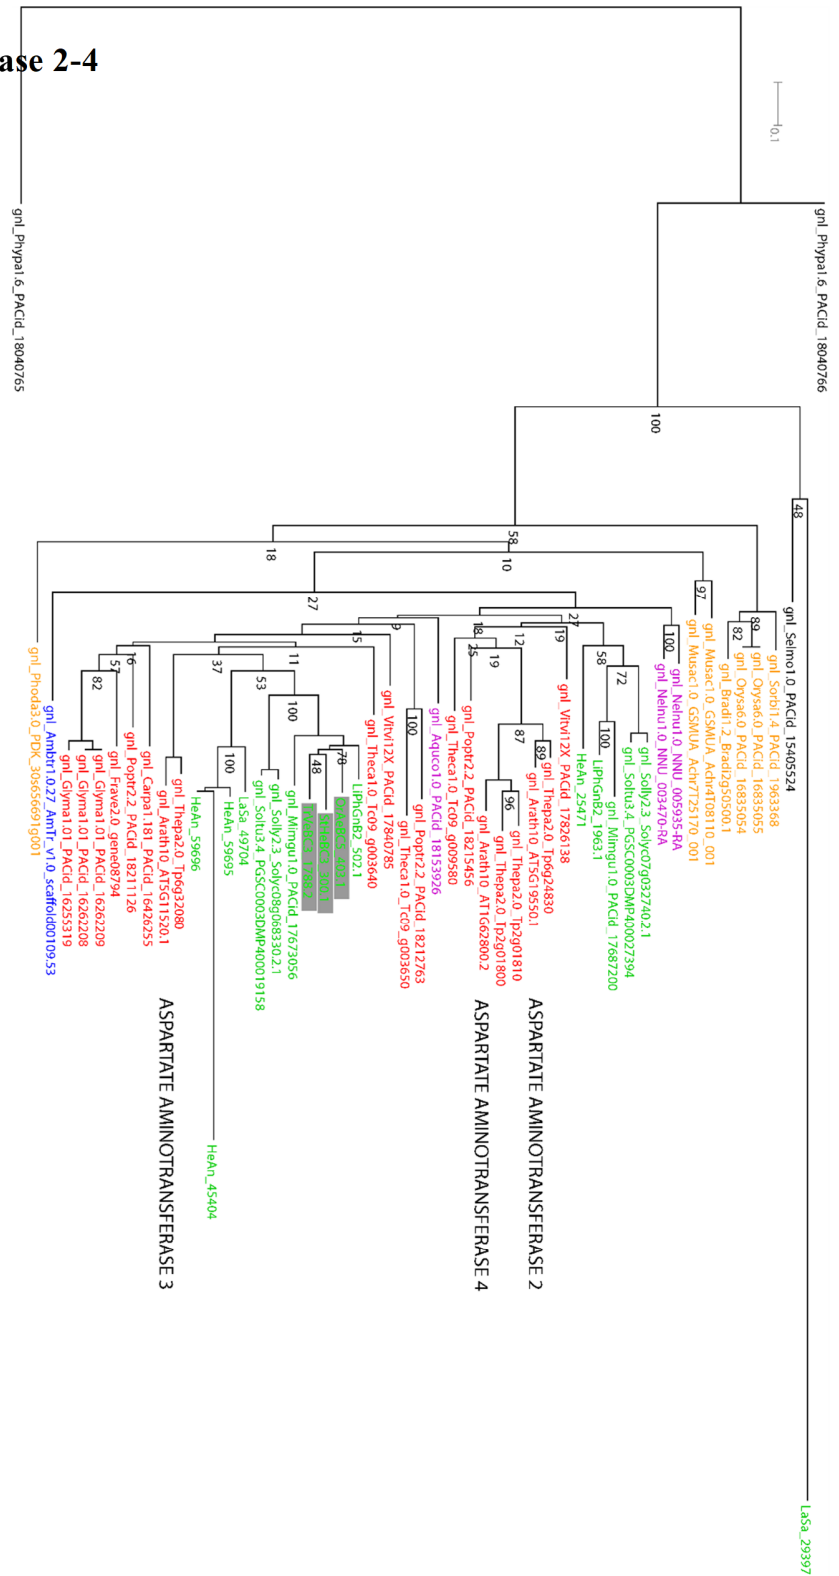

E.

Aspartate aminotransferase 5  
Orthogroup 5243

- AT4G31990.3
- OrAeBC5\_6581.1
- TrVeBC3\_3479.1

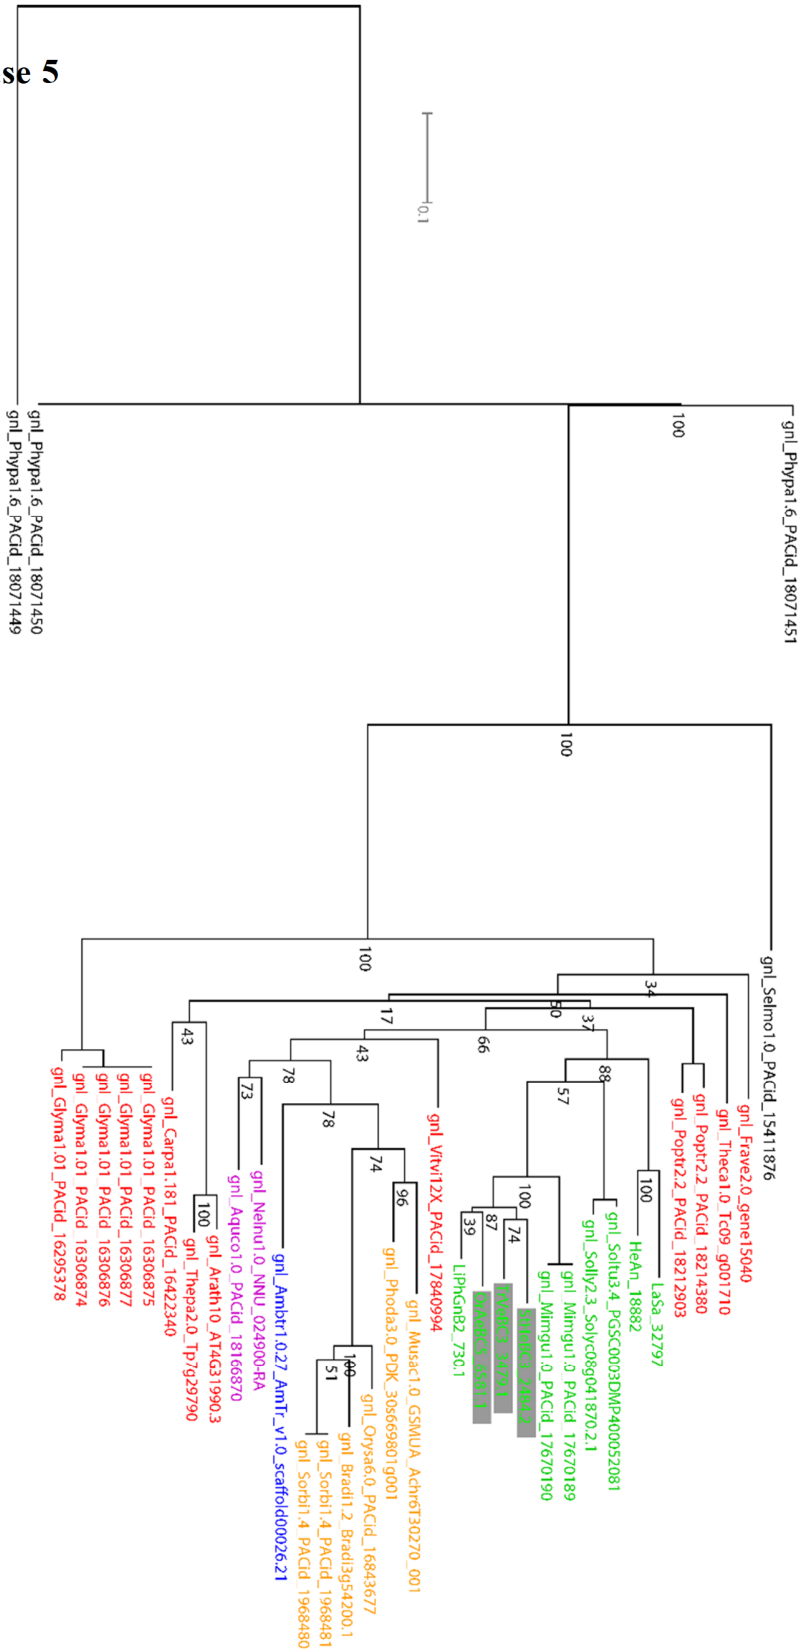

**Figure S3.** Phylogenetic trees of asparagine synthase and aspartate amino transferase homologs. Orthogroups and genes included in trees were determined using the PlantTribes database [39]. Orthogroups represent a PlantTribes delineated set of homologs and paralogs. Orobanchaceae homologs are highlighted in gray, and Orobanchaceae gene names and sequences are used as listed in the Parasitic Plant Genome Project database.
