# Supplementary material for: Comparative Metabolomics of Early Development of the Parasitic Plants Phelipanche aegyptiaca and Triphysaria versicolor
Source: MDPI journal article supplement (doi:10.3390/metabo9060114), 2019-06-13
Supplement: s1 [file s1]

| Species              | Orthogroup | Orthogroup description                                                                                              | Contigs used from Yang 2015 paper                                                                                                                      |
|----------------------|------------|---------------------------------------------------------------------------------------------------------------------|--------------------------------------------------------------------------------------------------------------------------------------------------------|
| <i>P. aegyptiaca</i> | 2325       | Aspartate aminotransferase 3 - Chloroplastic (orthogroup also contains cytoplasmic homologs in <i>A. thaliana</i> ) | OrAeBC5_403.1                                                                                                                                          |
| <i>P. aegyptiaca</i> | 5243       | Aspartate aminotransferase 5 - Chloroplastic                                                                        | OrAeBC5_6581.1 - OrAeBC5_6581.9                                                                                                                        |
| <i>P. aegyptiaca</i> | 4541       | Aspartate aminotransferase 1 - Mitochondrial                                                                        | OrAeBC5_36203.1, OrAeBC5_41726.1, OrAeBC5_49270.1, and OrAeBC5_53771.1                                                                                 |
| <i>P. aegyptiaca</i> | 2682       | Aspartate aminotransferase - Chloroplastic; prokaryotic-type                                                        | OrAeBC5_520.1                                                                                                                                          |
| <i>T. versicolor</i> | 2325       | Aspartate aminotransferase 3 - Chloroplastic (orthogroup also contains cytoplasmic homologs in <i>A. thaliana</i> ) | TrVeBC3_1788.1 and TrVeBC3_1788.2                                                                                                                      |
| <i>T. versicolor</i> | 5243       | Aspartate aminotransferase 5 - Chloroplastic                                                                        | TrVeBC3_3479.1                                                                                                                                         |
| <i>T. versicolor</i> | 4541       | Aspartate aminotransferase 1 - Mitochondrial                                                                        | TrVeBC3_2450.4, TrVeBC3_2450.5, TrVeBC3_2450.7, TrVeBC3_2450.8, TrVeBC3_2450.9, TrVeBC3_2450.10, TrVeBC3_2450.13, TrVeBC3_2450.14, and TrVeBC3_2450.15 |
| <i>T. versicolor</i> | 2682       | Aspartate aminotransferase - Chloroplastic; prokaryotic-type                                                        | TrVeBC3_2708.1                                                                                                                                         |
| <i>P. aegyptiaca</i> | 721        | Asparagine synthase - Class I                                                                                       | OrAeBC5_258.1                                                                                                                                          |
| <i>P. aegyptiaca</i> | 721        | Asparagine synthase - Class II                                                                                      | OrAeBC5_6915.1                                                                                                                                         |
| <i>T. versicolor</i> | 721        | Asparagine synthase - Class I                                                                                       | TrVeBC3_621.1 - TrVeBC3_621.8                                                                                                                          |
| <i>T. versicolor</i> | 721        | Asparagine synthase - Class II                                                                                      | TrVeBC3_4470.1                                                                                                                                         |

**Table S2.** Contigs used for expression analysis of two amino acid metabolism genes. Contigs and orthogroups described in Yang et al. 2015 [20] and used for expression analysis in Figure 8. Phylogenies of represented orthogroups are shown in Figure S2. Orthogroup descriptions are based on annotation of *A. thaliana* homologs present within the orthogroup. When multiple contigs are used, those contigs can be manually assembled and the sum of the FPKMs is used for analysis.
