# Supplementary material for: Comparative Metabolomics of Early Development of the Parasitic Plants Phelipanche aegyptiaca and Triphysaria versicolor
Source: Metabolites. 2019 Jun 13;9(6):114. doi: 10.3390/metabo9060114 (PMC6630630; doi:10.3390/metabo9060114)
Supplement: Supplementary file 1 [file metabolites-09-00114-s001.zip]

Archive with 6 entries (6 files):
- Supplemental Figure 1.pdf
- Supplemental Figure 2.pdf
- Supplemental Figure 3.pdf
- Supplemental Table 1.xlsx
- Supplemental Table 2.pdf
- Supplemental Table 3.xlsx
