# Supplementary material for: Comparative Metabolomics of Early Development of the Parasitic Plants Phelipanche aegyptiaca and Triphysaria versicolor
Source: Metabolites. 2019 Jun 13;9(6):114. doi: 10.3390/metabo9060114 (PMC6630630; doi:10.3390/metabo9060114)
Supplement: Supplementary file 1 [file metabolites-09-00114-s001.zip › Supplemental Table 1.xlsx]

## Sheet: Supplemental table _ANOVA
Table S1. ANOVA of metabolite levels. ANOVA was performed to evaluate the effect of stage, experimental batch, and species on each of 28 metabolites. P-values adjusted for multiple comparisons using the Benjamini-Hochberg method are shown. Numbers in black reflect p-values below 0.05, while the gray ones above 0.05. (a) ANOVA performed with all data from three experimental batches. (b) ANOVA perf…
	(a) Data from all three experimental batches			(b) Data from P. aegyptiaca - A. thaliana only			(c) Data from T. versicolor - M. truncatula only
	Stage	Batch	Species	Stage	Batch	Species	Stage	Species
Fumarate/maleate	0.00225185	6.31298e-37	4.5635e-42	0.224394	0.276518	0.108273	0.290809	2.60703e-23
Malate	0.100969	0.00394402	7.41328e-09	0.371036	0.304059	0.00321085	0.606985	3.36629e-08
Threonate	4.41045e-10	0.606503	0.0779996	2.6551e-12	0.00944212	0.582727	0.593336	0.591787
Citrate	7.12307e-07	0.099273	7.10672e-05	1.39128e-06	0.8516	3.32958e-05	0.37368	0.348064
Fructose	0.258463	0.248067	1.74751e-14	0.0684518	0.199258	7.50652e-06	0.841911	2.49047e-07
Glucose	0.938041	8.19555e-09	4.1641e-25	0.180873	0.303655	1.62249e-19	0.841911	5.12949e-07
Mannitol	7.08567e-09	6.44174e-14	1.11039e-48	2.7882e-06	0.523129	8.07222e-19	0.606985	8.29442e-40
Saccharate	0.000890442	0.583997	3.37406e-30	8.12994e-05	3.59514e-10	3.70221e-17	0.37368	3.58429e-05
Inositol	2.14818e-07	1.65726e-05	0.467393	2.75083e-08	0.045623	0.230355	0.827754	0.514309
Glucose6P	9.19889e-06	0.00323482	3.16333e-11	6.5078e-07	0.00746291	0.0013074	0.37368	2.49047e-07
Sucrose	0.0103945	0.368147	0.00248376	0.000119013	0.602099	0.055464	0.248203	0.000100195
His	0.0888782	1.82621e-18	2.63994e-34	0.00520282	3.53988e-09	4.40708e-06	0.145666	1.30788e-12
Asn	0.938041	2.03994e-31	3.90552e-34	3.98331e-07	2.75592e-10	0.925792	0.0879164	2.07205e-08
Ser	0.263039	6.15198e-07	1.78919e-18	9.41451e-06	1.48147e-11	0.374294	0.37368	0.489402
Gln	0.000281472	0.605207	7.36016e-22	7.07174e-06	0.00315553	0.230517	0.827754	2.20868e-18
Arg	0.00420672	0.248067	2.20067e-14	0.000834832	0.802012	8.0983e-10	0.290809	3.25943e-17
Gly	0.62772	0.00852929	1.16813e-19	0.098032	3.12819e-12	0.323529	0.343389	0.00227168
Asp	1.10913e-06	0.561642	1.49983e-07	5.78133e-07	3.32257e-05	0.411481	0.37368	1.87583e-05
Glu	0.00332723	0.0355407	1.74751e-14	3.61038e-06	0.0903052	0.302228	0.33118	1.25207e-13
Thr	0.0238955	0.221393	1.88208e-12	1.48044e-11	1.55109e-10	0.000694515	0.145666	0.000214631
Ala	2.14818e-07	3.99994e-06	3.19544e-11	1.01005e-10	1.6597e-12	0.240403	0.841911	2.88957e-05
GABA	1.22556e-09	0.00323482	7.24183e-23	8.65817e-09	1.27973e-10	2.00615e-14	0.0879164	0.000101772
Pro	0.00811643	0.905806	5.12091e-13	0.00034792	9.13638e-06	9.32583e-07	0.00242455	2.36472e-05
Lys	0.221942	4.79822e-06	2.83242e-14	0.422278	6.62461e-14	1.39211e-08	0.37368	0.289599
Val	0.024177	3.48883e-21	2.42515e-46	8.65817e-09	1.55109e-10	0.022564	0.37368	2.60703e-23
Ile	0.472776	0.0657686	4.37689e-10	0.000313916	9.13638e-06	4.9733e-05	0.290809	0.0123287
Leu	0.00811643	0.00323482	2.26376e-05	0.000224332	2.38454e-05	0.000120847	0.606985	0.958865
Phe	0.190028	0.248067	3.09814e-11	0.807659	0.000609112	0.000985911	0.290809	1.51758e-06
