# Supplementary material for: Comparative Metabolomics of Early Development of the Parasitic Plants Phelipanche aegyptiaca and Triphysaria versicolor
Source: Metabolites. 2019 Jun 13;9(6):114. doi: 10.3390/metabo9060114 (PMC6630630; doi:10.3390/metabo9060114)
Supplement: Supplementary file 1 [file metabolites-09-00114-s001.zip › Supplemental Table 3.xlsx]

## Sheet: Supplemental Table 3
Table S3. Metabolite profile data. Abundance of analyzed metabolites. The data included absolute and relative levels of FAAs and polar metabolites (sugars, sugar alcohols, and carboxylic acids), respectively. FAA levels are given in nmol/mg DW. Relative abundance of polar metabolites are derived from the from peak areas of the quantitation ion selected for each compound, normalized by dry weight …
Batch name	Experimental Batch	Species	Stage	Rep	Fumarate/maleate	Malate	Threonate	Citrate	Fructose	Glucose	Mannitol	Saccharate?	Inositol	Glucose6P	Sucrose	His	Asn	Ser	Gln	Arg	Gly	Asp	Glu	Thr	Ala	GABA	Pro	Lys	Val	Ile	Leu	Phe
1st P.aegyptiaca - A. thaliana batch	1	P. aegyptiaca	1	1	87.6	2337.3	17.5	436.6	2688.2	838.8	22535.3	77.2	773.7	121	4165.1	746.3	1768.6	2920.7	4061.4	6301	995.5	4299.9	7014.6	1584.9	2622.4	1025.4	5267.2	1721.6	1201.8	621.9	898.5	300.3
1st P.aegyptiaca - A. thaliana batch	1	P. aegyptiaca	1	2	78	3107.5	12.2	447.3	2306.7	816.6	16284.8	85.1	1023.5	198.2	4339.4	634.1	1298.5	2065.8	2737.8	5418.3	592	3592.4	7342.1	1343.6	1890.1	1061.4	4127.3	1523.2	919.1	516.7	723.2	236.3
1st P.aegyptiaca - A. thaliana batch	1	P. aegyptiaca	1	3	83.1	2988.4	14.5	451.5	2263.5	777.5	18255.2	67.2	810	127.1	3239.1	668.8	1240.8	2197.5	2980.7	5812.8	541.4	3318.1	6801.2	1429.5	2135.7	1134.6	4740.6	1548.7	970	534.5	769.2	235.3
1st P.aegyptiaca - A. thaliana batch	1	P. aegyptiaca	1	4	93.4	3277.1	20.7	535.8	2593.2	937.9	17505.4	60.7	688.7	104.9	1776.7	711.1	1283.7	2110.6	3547.7	6223.9	590.2	3855.7	7257.4	1419.8	1666.1	1154.7	5627.2	1589.5	961.8	484.3	718.4	284.3
1st P.aegyptiaca - A. thaliana batch	1	P. aegyptiaca	2	1	91.3	2319.1	20.4	457.2	1853.3	624.7	15802.3	49.9	775.3	110.1	901.8	744.9	1984	2487.7	8343.8	6671.4	43.3	2140.3	5593.6	1536.7	4555	1939.4	3532.8	1467.8	1173.1	547	772.5	285.4
1st P.aegyptiaca - A. thaliana batch	1	P. aegyptiaca	2	2	71	1760.1	16	483.5	1910.4	661.6	14151.5	48.3	844.2	80.8	3345.8	731.8	1813.1	2245	6523.8	5179.8	695.7	2096.1	5923	1494.1	3129	1851.4	3490.5	1348.6	1061.6	509.8	728.4	284.4
1st P.aegyptiaca - A. thaliana batch	1	P. aegyptiaca	2	3	106	3667	21	643.7	2345.5	714.8	22593.9	64.1	845	135.6	5350	765.3	1627.6	2840.3	3559.5	5717.3	772.8	3561	7475.7	1598.3	2653.3	1334.8	4284.3	1505.2	1093.8	538.8	748.7	313.9
1st P.aegyptiaca - A. thaliana batch	1	P. aegyptiaca	2	4	72.1	2000.8	20.4	541.8	2076.3	698.4	15443	58.7	768.1	113.3	1210	654.2	2589.8	2350.1	11074.1	4985.1	585.9	2572	5413.5	1694.4	2668.4	1123.7	2833.3	1290.4	1217	506.6	702.7	262.7
1st P.aegyptiaca - A. thaliana batch	1	P. aegyptiaca	2	5	122.8	3975.7	27.3	662.5	2779.7	1026.5	23113.2	87.9	915.3	111.3	2085.1	669.5	2107.4	2917.9	5524	5124.6	669.5	3340.1	7066.4	1457.5	3074.7	1068.9	4185.3	1505.6	1175.8	570	842	311.9
1st P.aegyptiaca - A. thaliana batch	1	P. aegyptiaca	3	1	189.2	3895	57	739.6	1928.1	715.9	17833.4	113	692.8	112.8	13424.6	662.5	2996.6	2175.2	6001.1	4191.9	695.9	5274.2	8167.6	1359.5	2988	2381.4	1111.6	820.8	983.8	338.9	467.7	321.7
1st P.aegyptiaca - A. thaliana batch	1	P. aegyptiaca	3	2	123	2876.9	44.6	692.5	1319.7	507.9	17272.9	106.4	491.8	155.2	12483.8	829.1	5189.6	2243.5	6303.5	5358	634.4	6221.1	8475.2	1651.3	3070.6	4080.1	1790	1037.4	1263.2	499.5	636.1	223.5
1st P.aegyptiaca - A. thaliana batch	1	P. aegyptiaca	3	3	88.7	2098.6	57.1	795.8	1475	597.9	15223.5	105.2	617.4	238	19644.7	981.4	5812.9	2504.1	9693.3	7729.1	662.8	6674.4	9234.8	1730.2	3905.1	2396.3	1438.3	1212.1	1285.5	454.2	558.4	218.1
1st P.aegyptiaca - A. thaliana batch	1	P. aegyptiaca	3	4	75.6	1920.7	72.1	723.8	1675.4	657.9	10541	97.2	560.1	187.6	13253.5	1003.4	7585.4	2621.6	10628.6	8716.9	698.6	7173.5	9330.3	1971.9	4998.6	3011.8	1957.5	1239.7	1466.1	528.2	656.9	218.1
1st P.aegyptiaca - A. thaliana batch	1	P. aegyptiaca	3	5	114.8	2727.2	181.7	539.4	1566.4	757.7	11526.7	90	780.7	160.6	7708.8	693.2	5354.1	2305	8581.7	5692.6	537.7	7526.7	7651	1632.9	3026.2	2870.9	1464	917.1	1341.9	487.8	715.4	253
1st P.aegyptiaca - A. thaliana batch	1	P. aegyptiaca	4.1	1	112.5	5607.3	1021.3	734	4139.2	1312.2	7527.4	242.3	2387.1	678.7	38491.6	691.2	8466	4738.2	31993.4	8356.6	667.8	15006.2	15860.3	2640.8	15583.6	1862	1091	713.1	2413.3	578.4	1042.8	224.5
1st P.aegyptiaca - A. thaliana batch	1	P. aegyptiaca	4.1	2	148.8	3023	806.8	1259.5	3200.6	1079.2	9117.6	455.1	4384.4	408.8	37547.4	970.7	20874.8	7694.6	49369.8	18189.7	1008.6	20441.7	16713.4	5595.8	27315.3	3394.9	1215.8	1239.6	3844.5	880	1062.3	306.3
1st P.aegyptiaca - A. thaliana batch	1	P. aegyptiaca	4.1	3	113.6	4658.8	1149.6	725.4	3890.5	1240.9	6405.3	310.2	2445.6	438.9	17592	594.3	5452.7	3622.6	24098.3	6042.1	601.3	19368.7	15167.2	2760.7	7825.8	3094	1375.3	667	2559.4	658.9	1377.6	312.6
1st P.aegyptiaca - A. thaliana batch	1	P. aegyptiaca	4.1	4	108.5	4499.7	890.1	678.8	3957.1	1323.5	7190.3	346.6	2576.4	615.3	30781	782.5	12439.1	7118.8	40730.9	12538.8	914.2	27551	23596.1	5033.2	19908.3	3406.8	1492.4	1002.3	3859.1	1119.1	1676.3	350.4
1st P.aegyptiaca - A. thaliana batch	1	P. aegyptiaca	4.1	5	142.2	2784.4	1539.1	812.1	5164.9	1703.1	5732.4	681.8	4133.9	671.7	50922.2	1498.2	21493.7	8923.5	43155.9	21868.3	1240.1	23819.5	24985.1	6564.5	19416.6	4371.9	1951	1873.5	4505.3	1257.9	2239.8	641.9
1st P.aegyptiaca - A. thaliana batch	1	P. aegyptiaca	4.2	1	279.9	9453.9	1163.2	3446.7	5618.9	1530.7	12532.1	1002.6	4817.8	519.9	35708.9	801.6	5621	6247.9	12959.8	7678.6	618.4	36410.5	16022.1	5066.3	6834.3	1557.7	1793.7	983.3	3655.2	1302	4367.9	604.6
1st P.aegyptiaca - A. thaliana batch	1	P. aegyptiaca	4.2	2	272	13248.9	1174.7	2824.1	5740.9	1426.9	14917.7	616.2	5210.2	283.7	32927.4	901.4	6954	5162	10197.4	7527.1	592.2	33677	16750.3	6551.8	3039.4	2017.9	1128.7	1586.8	4763.4	2588.9	3817.2	583.9
1st P.aegyptiaca - A. thaliana batch	1	P. aegyptiaca	4.2	3	536.2	11370.3	991.2	2194.9	3742.9	802	11116.5	397.4	4019.7	272.4	25613.8	383.2	6819.3	7184.5	9887.6	2070	724.9	33774.6	13370.2	6532.9	5387.2	1986.5	1192.4	639.5	4300.5	1548.1	2347.5	520.5
1st P.aegyptiaca - A. thaliana batch	1	P. aegyptiaca	4.2	4	177.8	11786.7	1724.3	3294.9	3956.3	1013.8	15128.7	1039.7	5250.4	554.8	38679.7	342.8	4065.7	5797.9	5935.1	2193.5	583.7	32599.1	14132.8	3699.6	4394.3	1744.5	1246.4	894.2	2800.5	1170.4	1612	337.4
1st P.aegyptiaca - A. thaliana batch	1	P. aegyptiaca	4.2	5	327.4	20416.6	1849.4	4335	7574.6	2199.8	22653.7	2428.2	7084.6	863.9	71500.9	1015.5	6437.2	7420	18793.6	8644.3	917.8	32930.6	20825.8	9108.8	6394.1	1859.3	1548.6	1402.1	5065.6	3562.9	6518.8	630.2
1st P.aegyptiaca - A. thaliana batch	1	A. thaliana	1	1	166.9	2025.8	103.5	601.1	1370.6	1475.5	0.7	62.6	1230.1	7.2	859.6	233.6	2154.1	2667.4	5501.9	0	913.9	7994.7	9414.4	1587.4	3253.7	7200.5	715.8	558.9	603.3	136.8	303.3	207
1st P.aegyptiaca - A. thaliana batch	1	A. thaliana	1	2	172.2	1730.2	67.4	588	2372.9	2750.7	1.3	71.7	1276.4	54.9	6556.1	283.3	4178.1	4132.8	11068.1	0	1142	9753.6	10841.2	3472.1	5258.4	8789.2	1248.2	591	945.6	211.2	326.1	269.7
1st P.aegyptiaca - A. thaliana batch	1	A. thaliana	1	3	142.8	3078.9	130.9	2373.8	1696.1	2768.2	0.5	27.7	1273.2	14.7	22876.8	457	6874.7	6662.2	14503.9	0	1129.3	7537.1	9556.4	5292.4	5911.3	16018.7	1699.5	738.8	1672.4	434.8	540.4	309.6
1st P.aegyptiaca - A. thaliana batch	1	A. thaliana	1	5	77.1	1140.6	27.2	490.4	2070.2	1794.2	3.3	44.2	1062.1	19.1	7896.5	290.9	3343.7	3449.5	5850.6	0	603.6	9271.5	14310.4	2939.1	2725.6	5746.2	799.8	359.5	860.2	225.6	234.3	226.9
1st P.aegyptiaca - A. thaliana batch	1	A. thaliana	3	1	65.2	1133.6	44.5	631.5	1540.6	2032.5	579.9	39.3	1245	54.5	197.8	431.2	4020.7	3082.1	6846	726.7	697.2	7544.9	8064.7	2412.3	4305.1	10781.1	613.8	688.1	893.7	275.9	386.8	229.9
1st P.aegyptiaca - A. thaliana batch	1	A. thaliana	3	2	60.8	1031.9	40.3	542.4	1181.5	1342	1416.4	49.7	1407.4	23.4	30.4	548.2	3948.9	3449.6	8251.6	1221.9	1011.4	8047.3	7314.5	2382.7	6449.8	14113.6	726.9	992.7	1143.2	401.3	581.5	289.8
1st P.aegyptiaca - A. thaliana batch	1	A. thaliana	3	3	53.6	1330.1	42	1039.3	2056.1	2342.7	449.6	50.2	1163.9	71.7	1244.1	574.7	4822.9	3547.1	10685.7	732.7	769.1	8633.1	9847.3	3298.1	5956.7	11895.5	1367.9	658.1	1062.9	300.1	434.3	185
1st P.aegyptiaca - A. thaliana batch	1	A. thaliana	3	4	25.4	738.6	62.7	579.6	1542.3	2070.8	373	25.9	1016.3	49.7	61.1	491.2	4244.3	2294.4	6731	806.4	647.7	5349	4962.5	2864.5	4973.8	12417.9	1929.6	807.9	1101.7	390.7	642.2	222.9
1st P.aegyptiaca - A. thaliana batch	1	A. thaliana	3	5	43.9	1219.1	59	1160.8	1819.5	2712	448.5	52.2	1160.3	146.1	1916.6	614.7	6353.5	4926.3	11538.3	807.2	661.2	11288.7	9911.2	5156.4	6458.1	11256.6	1271.4	628.2	1814.4	468.5	733.2	320.6
1st P.aegyptiaca - A. thaliana batch	1	A. thaliana	4.1	1	56.2	2037.9	348.9	1806.7	1899.2	2253.8	383	41	1159.4	86.2	9185.5	526.3	6305.9	5512.4	12280.3	823.9	792.6	9748.8	10018.3	5063.7	6518.8	13545.5	843.3	414.8	1414.1	301.6	371	274.4
1st P.aegyptiaca - A. thaliana batch	1	A. thaliana	4.1	2	73.3	1344.4	235.3	1198	908.6	1174.5	693.1	53.9	1495.1	68.9	19358.5	412	4905.2	4009.8	10402.6	869	712.5	9891.7	9345.6	4776.4	8011.2	14350.6	692.4	713.5	1684.1	419.9	445.3	221.7
1st P.aegyptiaca - A. thaliana batch	1	A. thaliana	4.1	3	43.5	1507.6	97.4	1804.4	1229.6	2016.3	300.5	53.8	1438.2	40.2	2833.9	564.5	5568.8	3971.3	10826	806.5	717	11414.6	9500.3	3853.7	6083.9	15590.6	2427.3	674.2	1608.2	432.6	719.5	227.1
1st P.aegyptiaca - A. thaliana batch	1	A. thaliana	4.1	4	64.9	1425	150.4	1414.3	1852.3	2566.9	535.8	62.2	1282.7	109.5	11782.7	572.7	5311	4360.6	11343.9	798.7	770.5	9008.2	9662.5	4948.9	8871.2	15521.1	1561.7	688.5	1540.9	378.7	560.7	250.3
1st P.aegyptiaca - A. thaliana batch	1	A. thaliana	4.1	5	50.2	1339.9	259.8	1252.2	2243.8	2220.6	428.3	101.4	1222.8	78.7	6306.3	656.3	5277.3	5025.5	11482.9	981.1	894.9	10223	11505.4	4947.6	7156.8	11301	1420	639.9	2580.5	699.7	932.2	365.4
2nd P.aegyptiaca - A. thaliana batch	2	P. aegyptiaca	1	1	86.8	3798	27.5	333.6	2421.5	808.2	20222	57.2	684.5	38.8	3261.5	370.1	675.3	1087	1706.7	2694.5	209.5	1933.1	6081.3	724.6	681.2	252.5	2789	648.5	479.2	331.6	496.6	182.6
2nd P.aegyptiaca - A. thaliana batch	2	P. aegyptiaca	1	2	111.7	4812.7	31.4	423.3	2044.9	711	20046.3	57.6	635.2	46.2	6019	280.8	1036.4	1078	6664.2	1952.2	209	2619.8	8093.6	751.2	1053.5	657.5	2767.7	499.2	569.1	334.4	499.9	181.1
2nd P.aegyptiaca - A. thaliana batch	2	P. aegyptiaca	1	3	76.7	3097.6	53	388.2	3606.4	1178.1	24869.4	44	679	60.6	1800.6	456.4	1156.6	1509.4	3277.9	2928.9	303.6	2649.1	8296.9	996.5	1263.3	573.5	3076.3	624.8	700.9	356.4	502.1	180
2nd P.aegyptiaca - A. thaliana batch	2	P. aegyptiaca	1	4	102.7	3924.8	50.6	486.1	2406.5	855.9	20989.5	50.8	621.5	69.5	2554.5	391.8	1406.3	1360.4	8397.7	2810	253.8	3173.3	9073.6	962.7	1327.5	633.5	3059.8	619.5	760.4	338.8	493	166.9
2nd P.aegyptiaca - A. thaliana batch	2	P. aegyptiaca	1	5	79.7	3080.2	32	339.6	2517.2	873.8	16894.2	55.1	745.2	37.4	1359.9	376.9	441.8	1030.6	1352.6	2386.1	188.6	1560.1	5588.3	687.2	652.9	260	3402.9	672.2	416.8	309.1	470.6	182.2
2nd P.aegyptiaca - A. thaliana batch	2	P. aegyptiaca	2	1	59.1	1702.9	37.9	269.4	2397.5	749.9	12676.9	44.8	650.6	28.1	997.7	422.5	1828.8	1421.4	14421.4	4054	236.6	1104.6	4698.4	819.5	1739.2	534.7	3370.1	740.4	642.4	323.2	449.5	241.1
2nd P.aegyptiaca - A. thaliana batch	2	P. aegyptiaca	2	2	50.5	1528.3	42.4	322.2	2151.2	684.2	12144	54.9	686.5	27.8	1988.9	414.8	1361.9	1695.3	12041.1	3996.5	300.5	1236.6	5069.2	829.1	1829.1	482.2	2703.1	720	592.8	292.5	439.2	219.3
2nd P.aegyptiaca - A. thaliana batch	2	P. aegyptiaca	2	3	69.2	2126.7	43.7	330.9	1590.7	544.3	13053.9	59.9	685.7	23.7	2872	437.1	2182.8	1560.4	18516.9	4735.7	239.2	1483.3	5105	860.5	1489.5	548.7	3390.6	671.9	676.5	300.7	477.8	234.4
2nd P.aegyptiaca - A. thaliana batch	2	P. aegyptiaca	2	4	92.1	3753.9	51.3	414.9	1959.1	642.6	14911.4	46	623.1	31.4	1905.2	351.4	1815.1	1905.6	14292.2	3578.9	212.9	2316.6	6108.7	957.6	1748.5	508	1927.4	521.3	631.3	309.5	421.3	215.5
2nd P.aegyptiaca - A. thaliana batch	2	P. aegyptiaca	2	5	90.6	2655	46.4	526.4	1404.4	517.9	12096.3	54.7	667.3	45.3	3104.5	525.8	5322.6	3155.4	21113.6	4890.5	296.9	2629.1	7378.6	1392.9	2958	925.1	2337.9	829	884	329.3	448.4	247.3
2nd P.aegyptiaca - A. thaliana batch	2	P. aegyptiaca	3	1	55.1	1036.4	32.7	319.1	1679.9	684.8	10456.7	38.3	454.2	8.5	709.4	331	1066.2	1053.1	4408.6	1697.3	252.5	1884.8	5187.1	712.3	1248	1422.1	974	394.9	472.4	222.6	318.5	132.4
2nd P.aegyptiaca - A. thaliana batch	2	P. aegyptiaca	3	2	53.1	1449.3	58.3	343.6	1954.7	753.9	12041.6	48.2	459.4	23.9	1744.7	447.3	748.1	1187.3	3363	1810.6	321.1	2470.5	6686.1	725.8	1469.8	1059.9	1080.4	432.6	465.5	219.1	265.5	130.2
2nd P.aegyptiaca - A. thaliana batch	2	P. aegyptiaca	3	3	57.3	1351.9	37.5	298.1	2277.5	870.2	12242.9	57.3	561.6	16.5	1175.3	496.7	922.5	897.5	4701.9	2079.5	163.2	2062.4	5414.9	707.8	1561	1800.4	1121.1	471.7	476.3	207.9	310.2	126.8
2nd P.aegyptiaca - A. thaliana batch	2	P. aegyptiaca	3	4	45.3	1210.6	58.5	324.5	1717.9	707.1	12075.5	55.4	513.8	30.3	698.7	544.8	1183.2	987.3	4342.1	3203.9	186.4	2463.6	7229.7	800.7	1339.8	1213.8	1581.8	657.6	568.2	244.6	339.4	165.1
2nd P.aegyptiaca - A. thaliana batch	2	P. aegyptiaca	3	5	53.9	1721.5	39.8	386	1945.1	724.6	12457.3	61.3	453	23.2	2071.3	502.6	927.5	939.1	2974.1	2127.1	211.7	2107.3	6440.7	783.6	1347.7	1135.4	1340	485.1	480.4	247.8	316.9	142.6
2nd P.aegyptiaca - A. thaliana batch	2	P. aegyptiaca	4.1	1	72.9	2524	1164	571.8	1964.4	717.1	3982	98.3	1811.2	209.1	53561.8	1052.9	5602.9	2786.2	32668.4	12449.9	178.2	8782.1	15655.9	3068.6	4891.1	1550.8	433.7	764.8	1917.2	681.3	1232.1	156.2
2nd P.aegyptiaca - A. thaliana batch	2	P. aegyptiaca	4.1	2	102	2958.6	2148.5	881.9	1814.9	672	4262.1	334.6	2367.4	277.1	76134.9	1218.3	9202.8	4603.5	30465.9	21682.4	214.5	15429.3	26540.9	5173.3	5749.8	1940.3	728.4	1144.1	2781.3	1141.6	1852.8	466.6
2nd P.aegyptiaca - A. thaliana batch	2	P. aegyptiaca	4.1	3	99.7	3058.6	1275.1	550.7	1612.2	527.1	9673.8	217.9	2080.6	221.4	42373.8	413.2	2007.4	1974.6	9543.7	4590.5	228.5	12744.4	15217.3	2037.6	3332.9	1544.5	527.8	380.5	1267.7	413	618.4	183.5
2nd P.aegyptiaca - A. thaliana batch	2	P. aegyptiaca	4.1	4	132.7	6449.8	1300	696.9	2982.2	874.7	13640	109.4	2237.5	264.6	60174.2	616.1	2192.4	2359.8	11888.4	3924.2	3401.5	9111	17906.8	2137.4	5128.1	1818.2	582.3	420.9	1196.4	456.9	710.3	209.3
2nd P.aegyptiaca - A. thaliana batch	2	P. aegyptiaca	4.1	5	82.8	2762.8	1031.6	414.7	4361.7	2000	8938.2	64.5	2322.4	249.9	4613.9	384.1	1829.7	1744.2	7902.6	3433	118.9	9276.5	15147.7	1994.2	3513.6	1500.8	434.4	350.7	1037.2	351.5	477	173.6
2nd P.aegyptiaca - A. thaliana batch	2	P. aegyptiaca	4.2	1	249.4	18475.8	1722.3	5621.2	6346.4	1243.3	25959.9	221.8	3104.5	245.5	92698.3	262.1	2734.1	4283.8	11019.2	1428.2	323.8	10097.8	20987.9	2119.8	6390.1	1394.2	865.5	224	1454.7	502.2	785.7	232.9
2nd P.aegyptiaca - A. thaliana batch	2	P. aegyptiaca	4.2	2	139.2	13182.8	2745.2	2902	2918.2	849.9	16534	567.1	4182.5	236.2	57950.3	327	3617.9	2500.1	6553	2553.6	242.5	12700.5	10550.1	1919.7	2717	1310.3	389	534.3	1623.1	680.6	1245.7	266.7
2nd P.aegyptiaca - A. thaliana batch	2	P. aegyptiaca	4.2	3	107.9	18917.7	2004.6	2997.6	2981.7	678.5	24912.9	638.6	4277.2	237.2	80894.9	276.8	1248.2	2377.8	5324.2	1815.5	145.2	14095.2	14125.6	2078.5	2340.8	767.6	452.2	383.5	1272.8	504.6	567.1	176.3
2nd P.aegyptiaca - A. thaliana batch	2	P. aegyptiaca	4.2	4	76.6	14766	2180.1	2050.1	1779.3	508.6	15802.2	833.8	3827	191.4	48948.9	145.7	681.2	2561.7	3337.5	520.1	183.5	10736.4	10861.2	1836.1	1885	292.8	261.1	248.7	966	324.5	375.5	176.2
2nd P.aegyptiaca - A. thaliana batch	2	P. aegyptiaca	4.2	5	77.3	10413.3	1707.5	1417.7	4117.4	725.7	13037.7	744.2	4840	173.7	79838.3	116.2	453.3	1823.9	1572.8	270	152	8716.2	9330.4	1334.8	1276.4	253.5	262.3	194.1	819.5	277.5	345.1	167.3
2nd P.aegyptiaca - A. thaliana batch	2	A. thaliana	1	1	343	10856.3	305	1702.1	2348.6	2411.3	0	0	888.3	128.5	6965	142.6	686.6	2102.2	2414	439	124.8	7272.1	8150.5	1150.6	1506.9	298.5	270.8	260.2	756.8	388.2	413.6	106.4
2nd P.aegyptiaca - A. thaliana batch	2	A. thaliana	1	2	389.7	8569.7	253.5	1102.8	1355.1	1129.1	0	0	990.1	117.9	5581.4	110.5	229	1296.9	1851.8	305.5	127.7	7536.7	7718.2	736.7	1210.7	247.1	234.6	152.4	695.9	207.7	250.2	198.9
2nd P.aegyptiaca - A. thaliana batch	2	A. thaliana	1	3	299.4	6828.8	257.3	1915.5	1575.8	2042.9	0	0	790.9	56.4	30667.3	118.4	451.5	2300.5	1636.7	298.6	322.3	6404.7	7955.1	941.7	2127.7	310.7	233.1	133.8	576.9	194.7	260.1	133.9
2nd P.aegyptiaca - A. thaliana batch	2	A. thaliana	1	4	146.9	2257.6	443.5	587.6	2741.1	2576.3	0	0	784.9	72.1	2502.6	399.7	6406.7	3647.6	4835.6	1910.7	202.3	17191.1	14249.9	2405.2	2556.3	749.3	371.2	543.3	1677.9	1059.4	1332.8	370.3
2nd P.aegyptiaca - A. thaliana batch	2	A. thaliana	1	5	304.5	14959.5	247	2032.7	1783.4	2426.3	0	0	1075.7	93.8	17208.1	149.6	579.6	1464.2	2100.3	494.3	122.3	8727.3	7724.6	1080.9	1022.3	253.4	250.3	273.9	669.5	342.5	551.9	166.1
2nd P.aegyptiaca - A. thaliana batch	2	A. thaliana	3	1	76.5	1543.7	178	1774.1	2291.8	2379.8	1091.3	0	715.8	57.7	4965.7	170.7	656.4	1130.5	2763.5	256.8	269.7	3029.1	5632.3	973.9	1507.5	4666.4	267	334.1	400.5	176.3	283.6	0
2nd P.aegyptiaca - A. thaliana batch	2	A. thaliana	3	2	71.5	2639	322.1	2055.9	1477.8	2302.3	551.2	0	860.7	76	3756.6	174.5	716.5	1040.8	3771.5	355.1	287.6	3885.8	6554.3	887.6	1870.8	2962.2	277	478.8	374.9	213.5	352.9	0
2nd P.aegyptiaca - A. thaliana batch	2	A. thaliana	3	3	79.2	2998.7	133.1	2490.8	2092.6	2868.6	1573.5	0	849.3	65.8	7722.8	222	1044.3	2159.7	3633.2	318.3	397.1	3585.7	8800.9	1594.6	1904.2	5268.2	408.1	262.5	466.1	178.5	297.3	0
2nd P.aegyptiaca - A. thaliana batch	2	A. thaliana	3	4	57.6	2633.2	190.5	2092.5	1528.6	2299.7	1164.6	0	877.3	72.1	7020.6	224.3	1563.8	1643	6861.9	242.4	341.5	2878.8	6952.4	1257.5	2111.9	5321.1	441.8	164.6	328.9	86.1	133.3	112.6
2nd P.aegyptiaca - A. thaliana batch	2	A. thaliana	3	5	64.3	3530.6	161.1	2560.4	738.7	1825	740.2	0	786.1	67	16459.8	224.9	922.3	1069	2961	241.6	223.2	1875.1	4715	1049.9	1446.4	4247.4	312	286.9	428	200.9	316.4	0
2nd P.aegyptiaca - A. thaliana batch	2	A. thaliana	4.1	1	64.6	1893.7	458.1	2943.3	2036.5	2931.7	408	0	1119.5	94.3	5452.5	535	2684.2	2626.1	18747.2	1020.3	275.2	5658.4	11415.9	3547.1	3482.8	9327.9	339.3	349	689.5	247.8	261.2	243.4
2nd P.aegyptiaca - A. thaliana batch	2	A. thaliana	4.1	2	43.2	984.8	417.9	1776.9	1345.4	2099.6	110.1	0	613.5	85	5297.3	281.4	2340.4	1601.4	7020.2	385.7	227.1	3973.1	8218.5	2871.2	2326.1	6342.1	191.5	288.4	829.7	244.5	336.8	221.4
2nd P.aegyptiaca - A. thaliana batch	2	A. thaliana	4.1	3	26.6	841.7	475.3	1333.1	1582.3	2232.8	353.8	0	770.5	70.3	1744.9	310	1891.8	1601.8	5623.1	387.3	292.7	3364.4	6673.5	2664.3	2602.4	8352.1	396.1	359.7	870.5	322.3	478.2	152.5
2nd P.aegyptiaca - A. thaliana batch	2	A. thaliana	4.1	4	41.9	2379.9	341.8	2712.6	1149.7	2316.4	187.9	0	937.2	74.1	9584.5	506.4	3238.4	3087.9	8152.1	778.6	367.7	3465.9	7580.9	4017.5	3008.2	8122.5	779.7	589.1	1319	430.2	863.7	0
2nd P.aegyptiaca - A. thaliana batch	2	A. thaliana	4.1	5	40.6	1699.3	469.4	2047.5	1061.4	2246	243.6	0	1179.1	94.4	4933.7	396.2	2946.6	1860.1	7202	562.1	294.3	4666.1	8419.2	4097.5	2467.1	8370.1	0	456.7	1135.9	423.8	646.8	207.1
T.versicolor - M. truncatula batch	3	M. truncatula	1	1	213.3	630.6	100.6	315.3	298.9	619.1	0	157.2	337.9	31.4	8881.9	21781	419615	6800.8	1942.1	1127.3	949.6	3500	6081.8	13235	617.2	2095.9	779.8	491.7	31954.7	1042.6	363.1	1132.8
T.versicolor - M. truncatula batch	3	M. truncatula	1	2	200	612.8	81.1	230.5	371.5	505.1	0	140.4	382.4	52.8	11763.6	16163.4	303699	3417	1872.6	948.7	857.9	3059.6	5671.2	4811.2	740.2	1993.6	755.7	533	30418.3	516.7	214.2	482.9
T.versicolor - M. truncatula batch	3	M. truncatula	1	3	315.6	661.1	125.2	342.8	944.5	1018.4	0	65.8	548.2	36.8	15014	18456.4	302257	9362	1795.4	911.8	1348.3	4183.9	8666.4	13031.5	995.2	2455.1	773.2	532.9	24077.5	2533.7	668.9	5258.3
T.versicolor - M. truncatula batch	3	M. truncatula	1	4	232.5	2690.6	208	1494.7	3844.9	1974.5	0	113.7	546.4	197.8	86065.1	2657.4	50339.8	3595.3	1741.2	516.1	839.4	6233.9	10148.6	2923.5	1333.8	3194.2	882.6	636.4	18117.6	543.8	440.1	474.5
T.versicolor - M. truncatula batch	3	M. truncatula	1	5	250.1	4192.4	257.1	2289.7	2858.6	1649.1	0	125.4	693.1	172.6	23518.4	3119.9	59296.4	4227.5	1569.9	511.1	799.8	6963.1	9574.9	2226.8	1138.5	3027.6	997.3	715.1	15018.8	677.7	577.2	481.8
T.versicolor - M. truncatula batch	3	T. versicolor	1	1	11787.2	3522.3	327.8	870.3	1713.9	5657.4	13600.6	73.5	941.6	512.5	4770.3	767.4	52160.6	10756.7	15177	4801.5	753.2	12637.8	24047.6	3827.3	5996.8	1492.3	1643.2	1187.2	2366.6	1641.6	1650.9	425.2
T.versicolor - M. truncatula batch	3	T. versicolor	1	2	7221.7	2861.5	197.1	924.8	1522.8	4035.7	5675.2	69.2	910.9	343.8	1587.8	761.6	48201.1	8781.7	11108.3	5610.1	676.9	9068.1	18523.5	2819.5	3254.7	517.8	1201.1	1044.6	1920.1	2588.3	1244.8	420.2
T.versicolor - M. truncatula batch	3	T. versicolor	1	3	10745.6	3197.3	146.5	777.3	6316	2020.5	40480.7	70.1	501	416.7	4426.3	1418.9	61455.8	8848.4	45189.2	10235.4	762.7	13705	27181.1	3341.2	4841	2730.9	2481	1233.5	2003.2	1044	1421	252.5
T.versicolor - M. truncatula batch	3	T. versicolor	1	4	7625.5	3023.7	131.3	669	7750.9	2577.5	53049.3	82.3	1144.9	389.7	14548.5	898.8	38275.9	8026	57545.9	7647	1753.9	7517.7	18789.7	2242.6	4735.1	1493.3	3350.6	576.2	1223.8	428.7	423.5	231.7
T.versicolor - M. truncatula batch	3	T. versicolor	1	5	6636.4	2710.6	97.6	660.9	8237.7	2899.5	46258.4	65.3	1077.4	304.2	6805.5	431.3	28200.2	5787.2	42739.1	3885.5	758.4	6278.4	16593	1641.5	3214.3	1119.2	2417.7	410	940.1	348.3	323.5	114.6
T.versicolor - M. truncatula batch	3	M. truncatula	2	1	235.7	903.5	100.7	460.5	1043.1	1091.1	0	111.3	680.5	135.2	8858.4	17223.1	351850	21605.7	2836.1	773.5	2636.9	7149.5	6504.3	20391.2	3376.6	2189.5	1238.3	486	36597.7	2883.7	906.5	4896
T.versicolor - M. truncatula batch	3	M. truncatula	2	2	141.8	767.3	49.9	393.5	2160.8	2156.6	0	96.4	704.2	142.3	852.8	13535.7	245957	9979.5	2557.6	1101.1	1540.3	10199.6	12713.5	11002.7	3619.3	2951	1740	535	22805.9	1466.4	591.9	1943
T.versicolor - M. truncatula batch	3	M. truncatula	2	3	115.5	573.9	63.3	257.1	1867.2	1653.6	0	71.5	1235.9	105.5	30728.8	14813.3	236913	10012.5	2137.2	539.2	1626.6	4329	5242.9	11700.2	1443	1387	1007.2	1660.9	23469.1	2519.7	925.5	4349
T.versicolor - M. truncatula batch	3	M. truncatula	2	4	134.7	530.4	54.2	216.7	1601.8	1329.6	0	68.5	1203.8	117.8	25758.2	16761.8	208544	10770	2092	536.7	4787.7	5546.9	6048.4	7563.2	3471.5	991.8	2494	1911	22431.4	1947.1	986	3141.6
T.versicolor - M. truncatula batch	3	M. truncatula	2	5	112.2	634.4	76.7	308.7	2207	1905.8	0	77.9	2189.1	133.7	31919.7	15614.5	265933	11616.8	2886.9	565.5	1612.8	4270.3	6300.7	12805.4	4577.4	1668.1	1212.9	1597.4	22995.9	2335.2	771.7	4436.6
T.versicolor - M. truncatula batch	3	T. versicolor	2	1	4137.5	1961	74.2	633.4	5310.8	4453	4385.4	54.6	507	245	2212.4	1175.3	25486.5	3102.8	30524.1	4587.4	587.8	7258.8	13571	1264.5	2733.3	1251.9	1004.1	380.9	570.9	177.6	191.8	85.8
T.versicolor - M. truncatula batch	3	T. versicolor	2	2	4509.7	1529.6	0	453.1	4421.3	3246.5	13622.5	60.3	435.7	143.3	5253.2	994	27277.2	4084.6	33514.2	4137.8	419.7	8485.3	19426.6	1533.5	3269.7	966.5	1207.5	397.7	822.1	248.8	262.4	103.9
T.versicolor - M. truncatula batch	3	T. versicolor	2	3	4178.1	2045.4	57.6	502.2	7319	3222.2	22872.8	48.4	668.2	197.2	5184.9	346.6	12748.4	3929	23865.9	2925.8	600.2	4437.2	15080.9	1208.4	3446.2	732.2	1915	213.6	671.1	215.5	206.8	82.8
T.versicolor - M. truncatula batch	3	T. versicolor	2	4	5774.9	3062.5	121.6	948.4	8741.5	5085.4	37806.3	81.4	933	411.3	19678.5	581.9	18886.5	6329.7	42726.3	3158.2	1030.5	7848.2	21688	2095.6	4394.4	1719.6	2968.1	335.3	1056.4	337.8	314.8	148.2
T.versicolor - M. truncatula batch	3	T. versicolor	2	5	6640.8	2561.6	74.3	645.7	7900.9	3887	33274.8	65.6	717.5	315	10361.9	383.6	19672.3	4312	36575.3	2863.8	590.8	5891.2	16435	1693.7	2911.3	774.9	2764.6	233.8	813.4	243.6	225.4	118.7
T.versicolor - M. truncatula batch	3	M. truncatula	3	1	220.6	802	117.1	390.8	1685.5	2251.9	0	118.4	1248.2	173.8	14173.3	22674.4	305195	13695.9	2942.3	588.6	2750.7	5301.2	5644.1	16879	3189.4	2938.9	1712.8	823.2	34066.3	2686.9	766.6	6611.9
T.versicolor - M. truncatula batch	3	M. truncatula	3	2	141.5	701.6	108	359.1	1738.1	1451.9	0	105.4	823.9	166.9	14371.9	14639.6	278395	22078.6	2403.7	1205	3876.7	7516.5	8831.4	17519.9	5176.1	4117.5	1913.1	853.7	29509.1	2926.2	1100.8	4961.8
T.versicolor - M. truncatula batch	3	M. truncatula	3	3	344.8	1560.3	332.6	2147.6	1856	1177.8	0	95	1191.7	138.4	23706.9	2130.5	56695.8	5064	2974.7	808.3	1009	8792.2	11359.3	1826	1548.4	7009.3	1465.9	541	10065.7	554.8	467.9	348.1
T.versicolor - M. truncatula batch	3	M. truncatula	3	4	141.9	1055.8	224.5	1037.9	1492.3	1157	0	120.5	608.7	127.2	19213.8	5938.1	123971	7114.5	2848.6	638.1	2889.2	9344.5	11097.8	3753.4	2003	5586.4	2148.9	744.7	21310.9	585.6	602.1	467.5
T.versicolor - M. truncatula batch	3	M. truncatula	3	5	132.3	895.6	99.1	470.6	946.1	1359	0	88.5	658.5	121.5	9715.8	16634.2	346425	14953.8	2681.6	562.8	2152.4	6803.7	7791.9	16630.9	2635.1	2524.4	2058.8	394.5	30246.7	2169	667.7	4019.5
T.versicolor - M. truncatula batch	3	T. versicolor	3	1	5756	2136.6	126.5	694.8	7207.4	5366.1	9607.4	78.7	687.1	347.3	3835.4	2085.3	40224	9539.2	56057.9	6216.5	2865.3	13858.2	19692.6	2910.2	6180.6	2890	3127.6	1088.1	1931.5	795.6	947.8	471.6
T.versicolor - M. truncatula batch	3	T. versicolor	3	2	5236	2063.7	82.8	555.5	3913	1784.8	14102.2	56.9	298.6	311.5	4205	1303.6	31247.7	4361	23345.5	5242.3	512.5	10383.6	17917.1	1694	3884	2487.1	1472.1	634.7	1086.9	427.5	353.4	163.3
T.versicolor - M. truncatula batch	3	T. versicolor	3	3	6110	2363.7	127.9	514.2	9190.1	3279.5	31397.5	81.5	775.8	470.3	4825	748.5	27194.6	5165.4	34534.9	4578.6	566.9	12585.6	21470	1933.5	4417.8	2593.3	1999.9	560.7	1262.2	472.4	566.2	165.7
T.versicolor - M. truncatula batch	3	T. versicolor	3	4	13787.1	3874.3	206.8	1151.8	5518.3	3649.8	27073.1	84.8	674.1	475.4	2162.3	1600.2	86499.3	8984.1	85065.6	6172.4	1005.1	15732.5	27775.9	3857.3	5519.6	3664.2	3061.9	828.2	2449.7	1134.4	867.1	302.7
T.versicolor - M. truncatula batch	3	T. versicolor	3	5	6573.2	2231.5	100.1	571.6	4898	2955.4	14049.5	76.9	482.3	287.7	3796.2	1140.3	37620.7	4744.8	45154.9	4709.6	620.2	12307.4	21176	1867.1	5111.6	2554.5	1588.4	432.4	991.1	335.7	318.9	148.7
T.versicolor - M. truncatula batch	3	M. truncatula	4	1	353.6	1252.7	113.7	906.3	931.5	1143.9	0	86.2	755.6	216.2	31777	3782.1	74999.5	3108.4	2883.5	845.8	636	3669.4	4859.6	1317.5	901.5	5310.5	1208.2	363.5	15304.6	317.7	290.3	226.3
T.versicolor - M. truncatula batch	3	M. truncatula	4	2	565.7	891.9	114.3	668.3	1457.8	1347.8	0	107.4	543	161.3	14603	5214.4	29762.6	3027.9	2743.4	1053.1	660.3	3888.3	4820.4	867.5	957.8	4703.8	2515.7	559.5	22964.6	429.3	323.8	228
T.versicolor - M. truncatula batch	3	M. truncatula	4	3	294.4	537.4	58.7	350.3	1843.5	1819	0	64.9	429.1	67.9	2077	5758.8	57705.3	2311.1	1699.9	869.6	499.8	3166.7	4175.5	2659.9	1097.5	3187.2	1365.6	605.9	11761.5	339.3	229.9	311.9
T.versicolor - M. truncatula batch	3	M. truncatula	4	4	303.5	1472.2	309.2	1868.8	1785.3	1276	0	86.6	1116.5	153.4	23748.5	2818.4	90042.4	5397.7	2447	872.8	546.7	7232.1	7268.3	1987.1	1906.1	5461.5	1617.2	468.2	15380.4	427.5	335	223.4
T.versicolor - M. truncatula batch	3	M. truncatula	4	5	774.8	1856.3	205.9	1296.2	1460.7	1507.1	0	120.6	577.9	131.6	12826.9	2071.8	40306.1	3290.2	2881.4	581	730.3	4851.7	6016.3	1472.3	1006.9	3912.2	1437.1	365.6	21738.4	338.3	273.6	299.1
T.versicolor - M. truncatula batch	3	T. versicolor	4	1	14027	6630.8	318.8	1559.2	7531.8	13102.5	41552.9	84.5	419.7	746.7	1776.9	555.6	31024.9	6709.7	17791.6	3245.9	640.6	12235.6	21840.6	2270.6	3558.6	1546.3	5010.8	752.4	1319.8	813.3	1049.3	194.5
T.versicolor - M. truncatula batch	3	T. versicolor	4	2	8138.3	3275.3	127.5	599.5	3277.1	1572.9	34012.1	82.6	477.7	414.3	5529.9	463	26255.5	7716.1	15091	2867.6	547.8	13408.9	21509.8	2084	3651.6	1990.7	3574.1	655.6	1304.1	608.5	921.1	227.7
T.versicolor - M. truncatula batch	3	T. versicolor	4	3	5689.8	2910.3	99.9	590.5	2131.1	1767.4	21395.1	59	445	295.3	2339.5	361	16660.2	5623.9	11148.7	2298.2	473.2	10738	17027.7	1741.9	2522.2	1513.8	4189.4	495.2	1167.3	538.5	585.4	197.4
T.versicolor - M. truncatula batch	3	T. versicolor	4	4	11185.6	4276.6	229.5	837.4	2938.7	2087.3	42219.2	29.1	1743.9	115.3	137.7	182.9	9161.1	4527.3	10650.9	2034.2	463	7855.7	13419.6	1302.9	2244	722.5	3572.8	350.6	771.2	407.9	420.3	125.7
T.versicolor - M. truncatula batch	3	T. versicolor	4	5	4547.5	3365.3	184.4	680.7	3127.3	2500.3	35382.7	59.6	720.8	217.9	1963.6	444	34473.1	6040.8	25306.9	3377.6	560.9	10333.3	16737.8	2002.7	2854	1670.4	5310.3	432.5	1235.2	572.6	518.4	173.4
